# Supplementary material for: Extreme Weather exacerbates Ozone Pollution in the Pearl River Delta, China: Role of Natural Processes
Source: Copernicus journal article supplement (doi:10.5194/egusphere-2023-1636), 2023-09-04
Supplement: Supplementary file 1 [file egusphere-2023-1636-supplement.pdf]

# **Supplementary Materials for “Extreme Weather exacerbates Ozone Pollution in the Pearl River Delta, China: Role of Natural Processes”**

Nan Wang<sup>1</sup>, Hongyue Wang<sup>2</sup>, Xin Huang<sup>3</sup>, Xi Chen<sup>4</sup>, Xiaopu Lyu<sup>5\*</sup>, Yu

Zou<sup>6</sup>, Tao Deng<sup>6</sup>, Tingyuan Li<sup>7</sup>, Fumo Yang<sup>1\*</sup>

<sup>1</sup>College of Carbon Neutrality Future Technology, Sichuan University, Sichuan, China

<sup>2</sup>Department of Atmospheric Science, China University of Geosciences, Wuhan, 430078, China

<sup>3</sup>School of Atmospheric Science, Nanjing University, Nanjing, China

<sup>4</sup>Institute of Mass Spectrometry and Atmospheric Environment, Guangdong Provincial Engineering Research Center for On-line Source Apportionment System of Air Pollution, Jinan University, Guangzhou, PR China

<sup>5</sup>Department of Geography, Hong Kong Baptist University, Hong Kong, 000000, China

<sup>6</sup>Institute of Tropical and Marine Meteorology, China Meteorological Administration (CMA), Guangzhou, China

<sup>7</sup>Guangdong Ecological Meteorological Center, Guangzhou, China

Correspondence to [xiaopu\\_lyu@hkbu.edu.hk](mailto:xiaopu_lyu@hkbu.edu.hk) and [fmyang@scu.edu.cn](mailto:fmyang@scu.edu.cn)

## **Supporting Information**

Supporting Information includes 12 pages, 9 figures and 4 tables

SI Figures S1-S9, p3-p10

SI Tables S1-S4, p11-p12

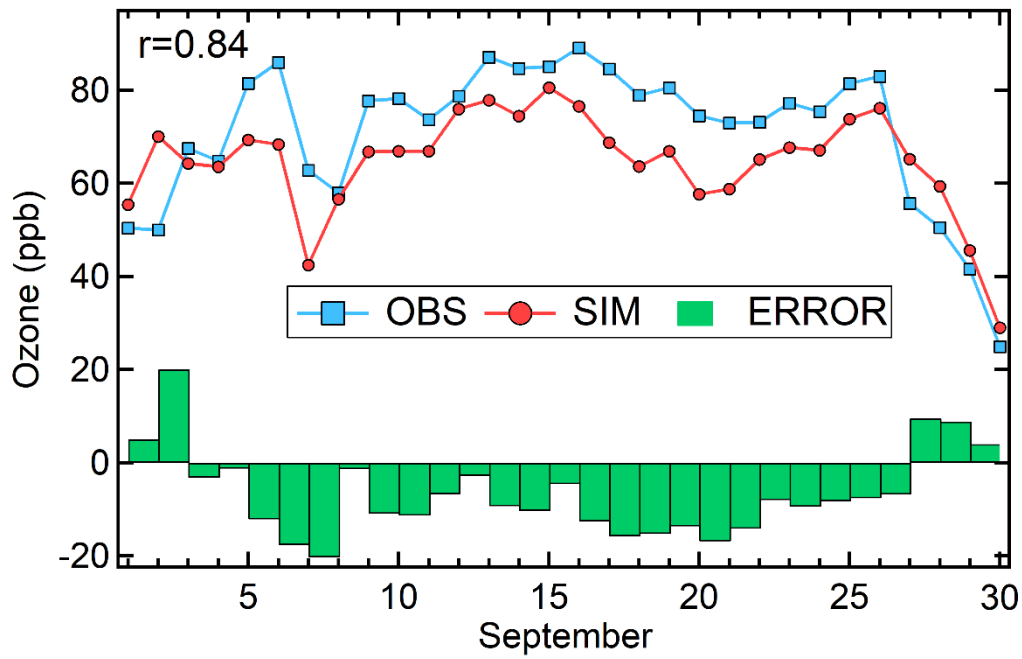

Figure S1 Validation of the stepwise regression model

## Monthly Comparison

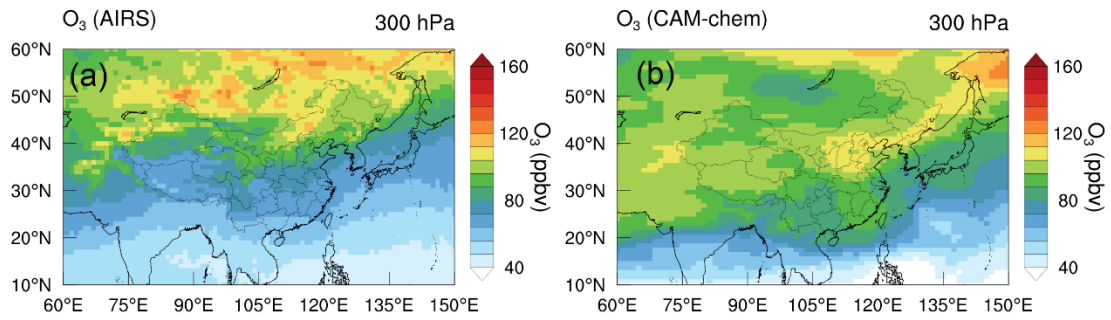

## Comparisons on Sep. 15 2022

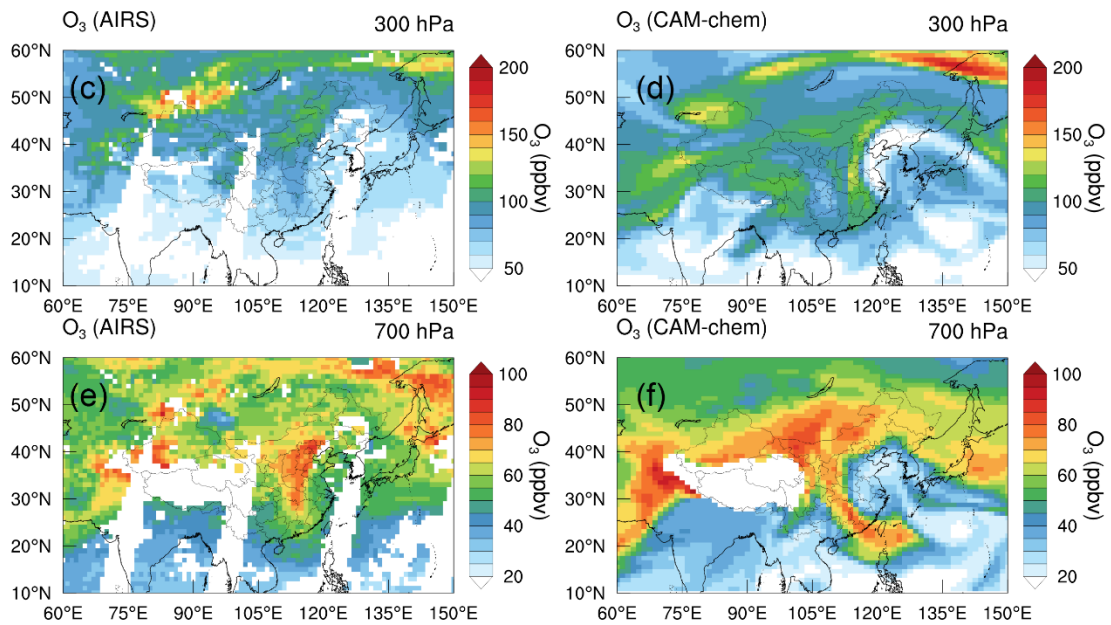

Figure S2 Comparisons of CAM-Chem simulated O<sub>3</sub> and satellite retrieved O<sub>3</sub> from AIRS. (a) and (b) distribution of monthly averaged O<sub>3</sub> levels at 300hpa; (c) and (d) distribution of 300 hpa O<sub>3</sub> levels on Sep. 15 2022 (illustrating the STE event); (e) and (f) same as (c) and (d) but at 700 hpa.

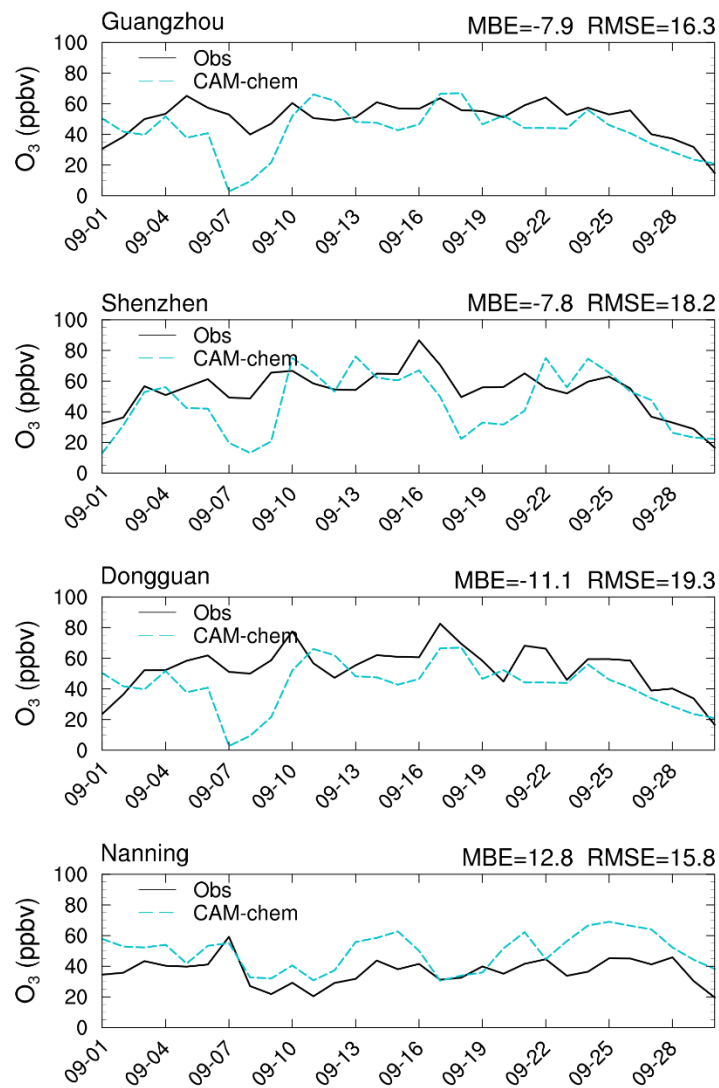

Figure S3 Comparisons of the CAM-Chem performance with surface monitoring O<sub>3</sub> concentrations (MBE stands for mean bias error and RMSE stands for root mean square error).

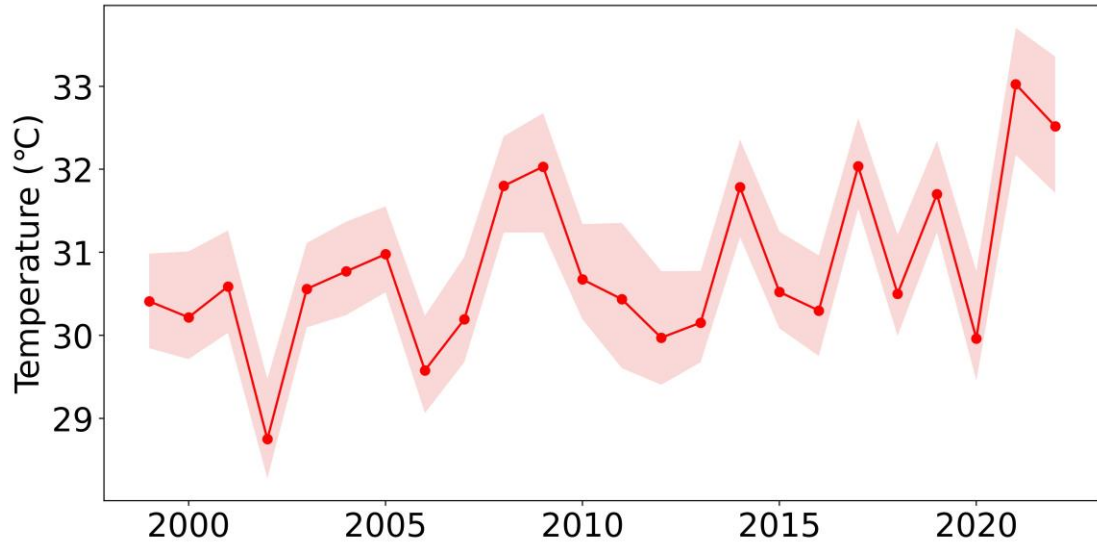

Figure S4 Historical variation of monthly average daily-maximum temperature in PRD in September from 1999 to 2022

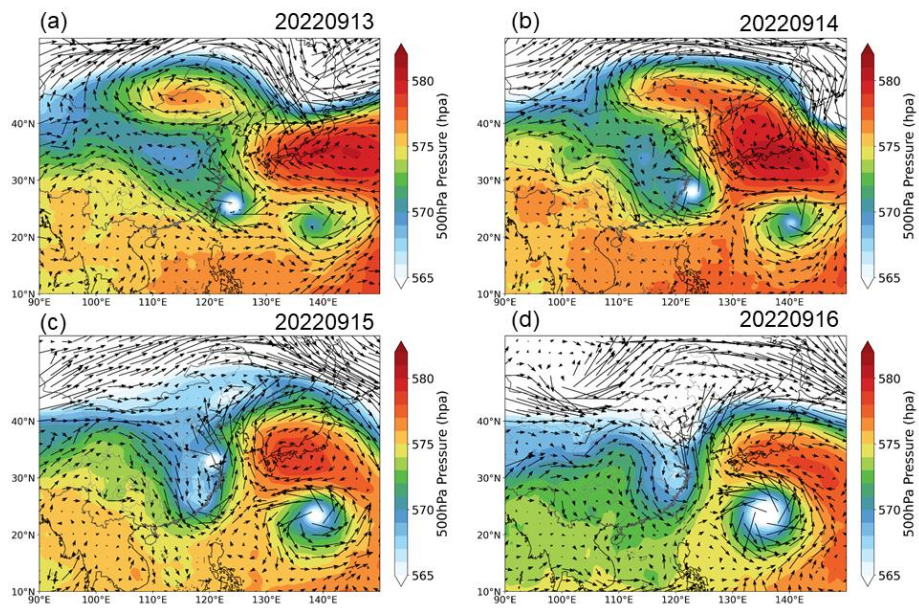

Figure S5 Synoptic weather from September 13 to September 16 2022

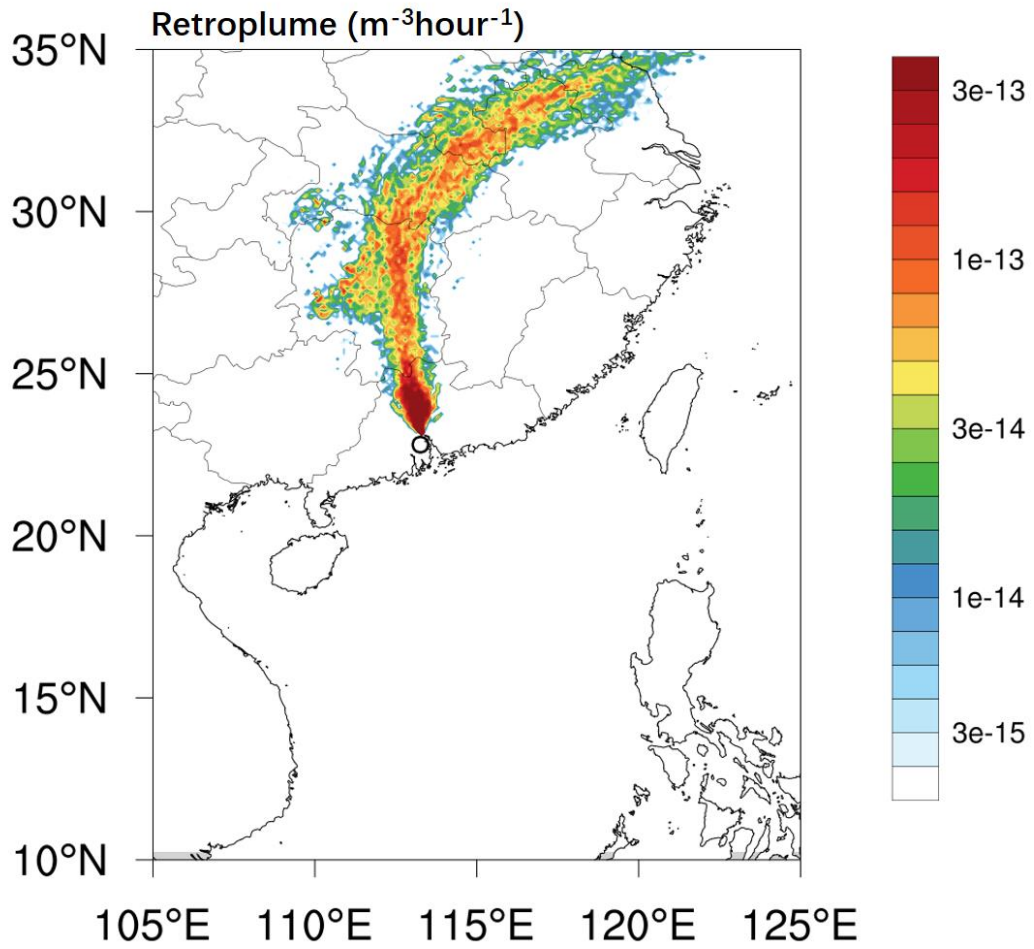

Figure S6 LPDM simulated 48h retroplume (footprint residence time) showing transport pathways of air masses impacting PRD



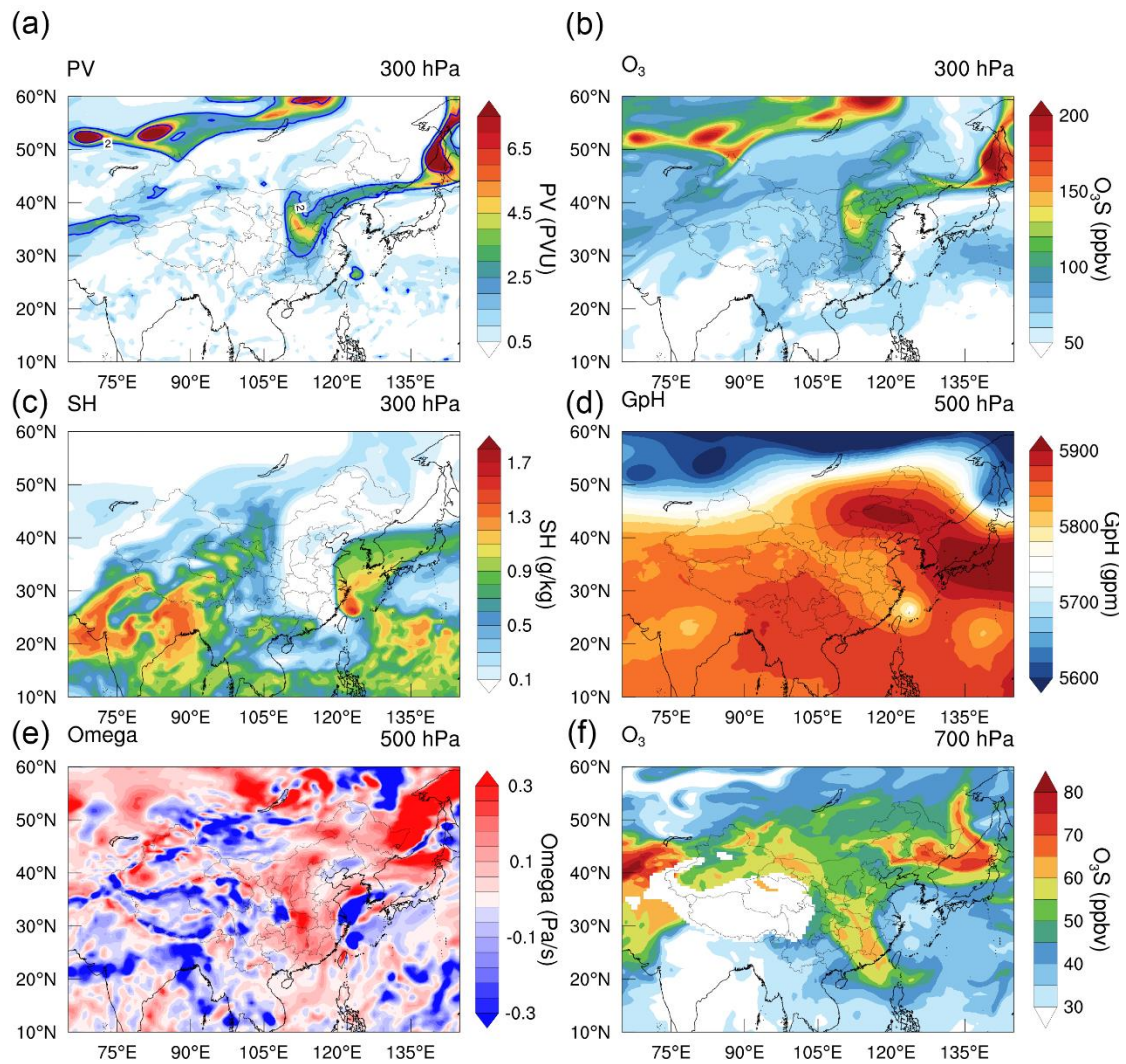

Figure S7 Evidence illustrating STE O<sub>3</sub> intrusion on September 13, 2022. (a) Spatial distribution of potential vorticity (PV) at 300hPa over China (The blue solid line indicates the dynamical tropopause of 2PVU, 1 PVU= $10^{-6} \text{ m}^2 \text{ s}^{-1} \text{ K kg}^{-1}$ ); (b-e) The distribution of O<sub>3</sub> concentration (at 300 hPa), specific humidity (at 300 hPa, SH), geopotential height (at 500 hPa, GpH), vertical velocity (at 500 hPa, Omega), and O<sub>3</sub> concentration (at 700 hPa), respectively. All the data were identified based on ERA5 database.



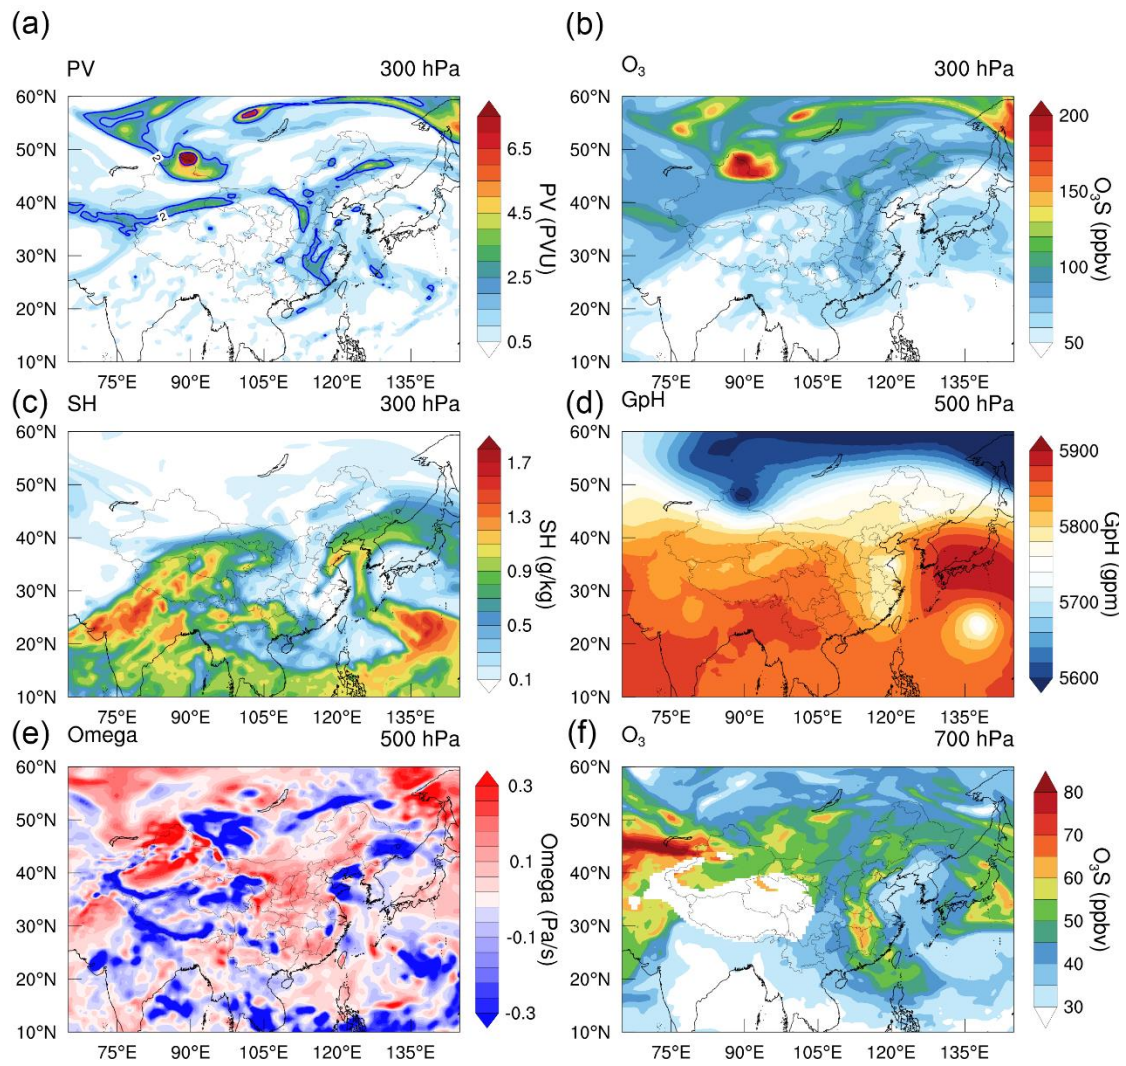

Figure S8 Same as Fig S7 but on September 15

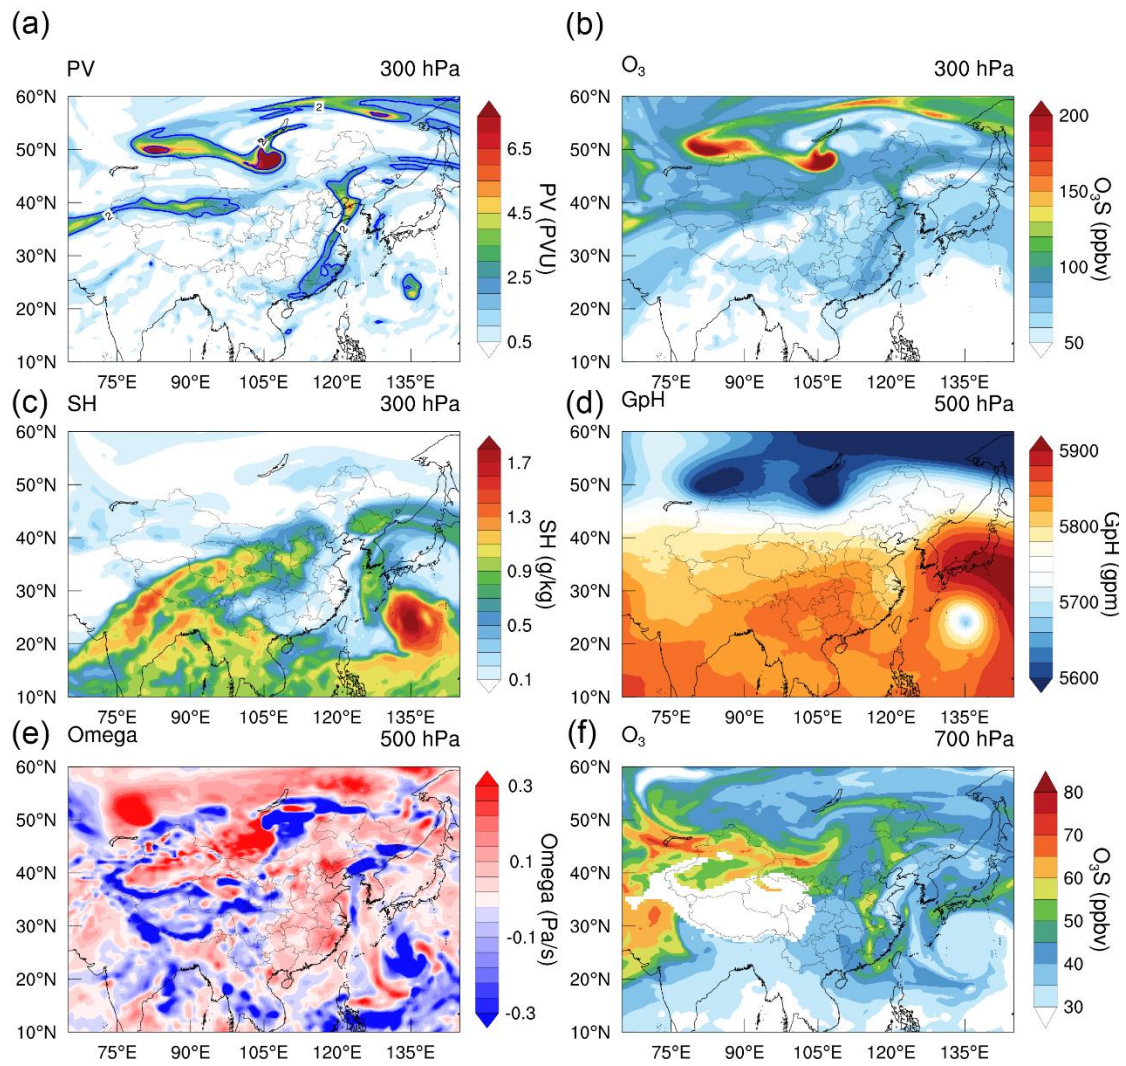

Figure S9 Same as Fig S7 but on September 16

Table S1 Introduction of monitoring instruments used in this work

| Parameter       | Manufacture       | model       | resolution |
|-----------------|-------------------|-------------|------------|
| O <sub>3</sub>  | Thermo Scientific | 49i-D1NAA   | 5min       |
| NO <sub>x</sub> | Thermo Scientific | 42i-DNMSDAA | 5min       |
| CO              | Thermo Scientific | 48i-DNSAA   | 5min       |
| SO <sub>2</sub> | Thermo Scientific | 43i-DNSAA   | 5min       |
| VOC             | AMA, Germany      | GC5000-FID  | 1h         |

Table S2 Configuration and settings of WRF-CMAQ modeling system

| Item                        | Scheme                                                                          |
|-----------------------------|---------------------------------------------------------------------------------|
| Grid resolution             | 12×12 km                                                                        |
| Initial/boundary conditions | WRF: NCEP FNL reanalysis data<br>CMAQ: Mother domain (36k×36km grid resolution) |
| Microphysics                | WRF single-moment 5-class microphysics                                          |
| Short-wave radiation        | Goddard                                                                         |
| Long-Wave radiation         | RRTM                                                                            |
| WRF nudging                 | Yes                                                                             |
| Boundary Layer              | ACM2                                                                            |
| Gas-phase Chemistry         | CB05                                                                            |
| Aerosol option              | AERO5                                                                           |
| Dry deposition              | M3DRY                                                                           |
| Anthropogenic emissions     | MEIC                                                                            |
| Natural emissions           | MEGAN                                                                           |

Table S3 WRF-CMAQ Model performance of O<sub>3</sub>, and NO<sub>2</sub> in Guangzhou

| Variables | O <sub>3</sub> (ppb)* | NO <sub>2</sub> (ppb)* |
|-----------|-----------------------|------------------------|
| MB        | -8.08                 | 1.76                   |
| NME       | -0.28                 | 0.11                   |
| RMSE      | 27.74                 | 9.42                   |
| IOA       | 0.74                  | 0.72                   |

\*The WRF-CMAQ simulated O<sub>3</sub> and NO<sub>2</sub> were validated with observed O<sub>3</sub> and NO<sub>2</sub> in Guangzhou using statistical metrics (MB stands for mean bias, NME stands for normalized mean bias, RMSE stands for root mean square error and IOA stands for index of agreement)

Table S4 The recorded tropical cyclones influencing PRD in September 2022

| Name      | Start time | End time | Max intensity |
|-----------|------------|----------|---------------|
| Hinnamnor | Aug 27     | Sept 8   | SuperTY*      |
| Muifa     | Sept 6     | Sept 16  | STY**         |
| Nanmadol  | Sept 12    | Sept 20  | SuperTY       |
| Noru      | Sept 21    | Sept 29  | SuperTY       |

\*SuperTY refers to super typhoon

\*\*STY refers to severe typhoon. The classification was based on China Grade of tropical cyclones (GB/T 19201-2006)
